# Supplementary material for: Synchrony of African rainforest solar induced chlorophyll fluorescence and environmental factors
Source: Copernicus journal article supplement (doi:10.5194/egusphere-2023-3022), 2024-04-15
Supplement: Supplementary file 1 [file egusphere-2023-3022-supplement.pdf]

**Supplementary Material  
for**

**Synchrony of African rainforest solar induced chlorophyll  
fluorescence and environmental factors**

Russell Doughty<sup>1\*</sup>, Michael C. Wimberly<sup>2</sup>, Dan Wanyama<sup>2</sup>, Helene Peiro<sup>1,3</sup>, Nicholas Parazoo<sup>4</sup>,  
Sean Crowell<sup>5</sup>, Moses Azong Cho<sup>6</sup>

<sup>1</sup>College of Atmospheric and Geographic Sciences, University of Oklahoma, Norman, OK, 73019, USA

<sup>2</sup>Department of Geography and Environmental Sustainability, University of Oklahoma, Norman, OK, 73019, USA

<sup>3</sup>Netherlands Institute for Space Research (SRON), Leiden, The Netherlands

<sup>4</sup>Jet Propulsion Laboratory, California Institute of Technology, Pasadena, CA 91109, USA

<sup>5</sup>LumenUs Scientific Solutions, LLC, Oklahoma City, Oklahoma.

<sup>6</sup>Precision Agriculture Research Group, Advanced Agriculture and Food, CSIR, Pretoria, South Africa

*Correspondence to:* Russell Doughty (russell.doughty@ou.edu)

Table S1. Mean annual total precipitation and standard deviation of monthly total precipitation in 2019-2021 for 11 African tropical evergreen broadleaf ecoregions.

| Forest Ecoregion                  | Mean annual precip. | Standard deviation of monthly total precip. |
|-----------------------------------|---------------------|---------------------------------------------|
| West Africa moist tropical forest |                     |                                             |
| Cameroonian Highland              | 2648 mm             | 163 mm                                      |
| Cross-Sanaga-Bioko Coastal        | 2609 mm             | 152 mm                                      |
| Nigerian Lowland and Niger Delta  | 2922 mm             | 177 mm                                      |
| Western Guinean Lowland           | 2450 mm             | 120 mm                                      |
| West Africa tropical forest       |                     |                                             |
| Eastern Guinean Forest            | 1544 mm             | 81 mm                                       |
| Central Africa tropical forests   |                     |                                             |
| Atlantic Equatorial Coastal       | 2147 mm             | 100 mm                                      |
| Central Congolian Lowland         | 1793 mm             | 45 mm                                       |
| Eastern Congolian Swamp           | 1799 mm             | 44 mm                                       |
| Northeastern Congolian Lowland    | 1803 mm             | 45 mm                                       |
| Northwestern Congolian Lowland    | 1650 mm             | 63 mm                                       |
| Western Congolian Swamp           | 1638 mm             | 49 mm                                       |

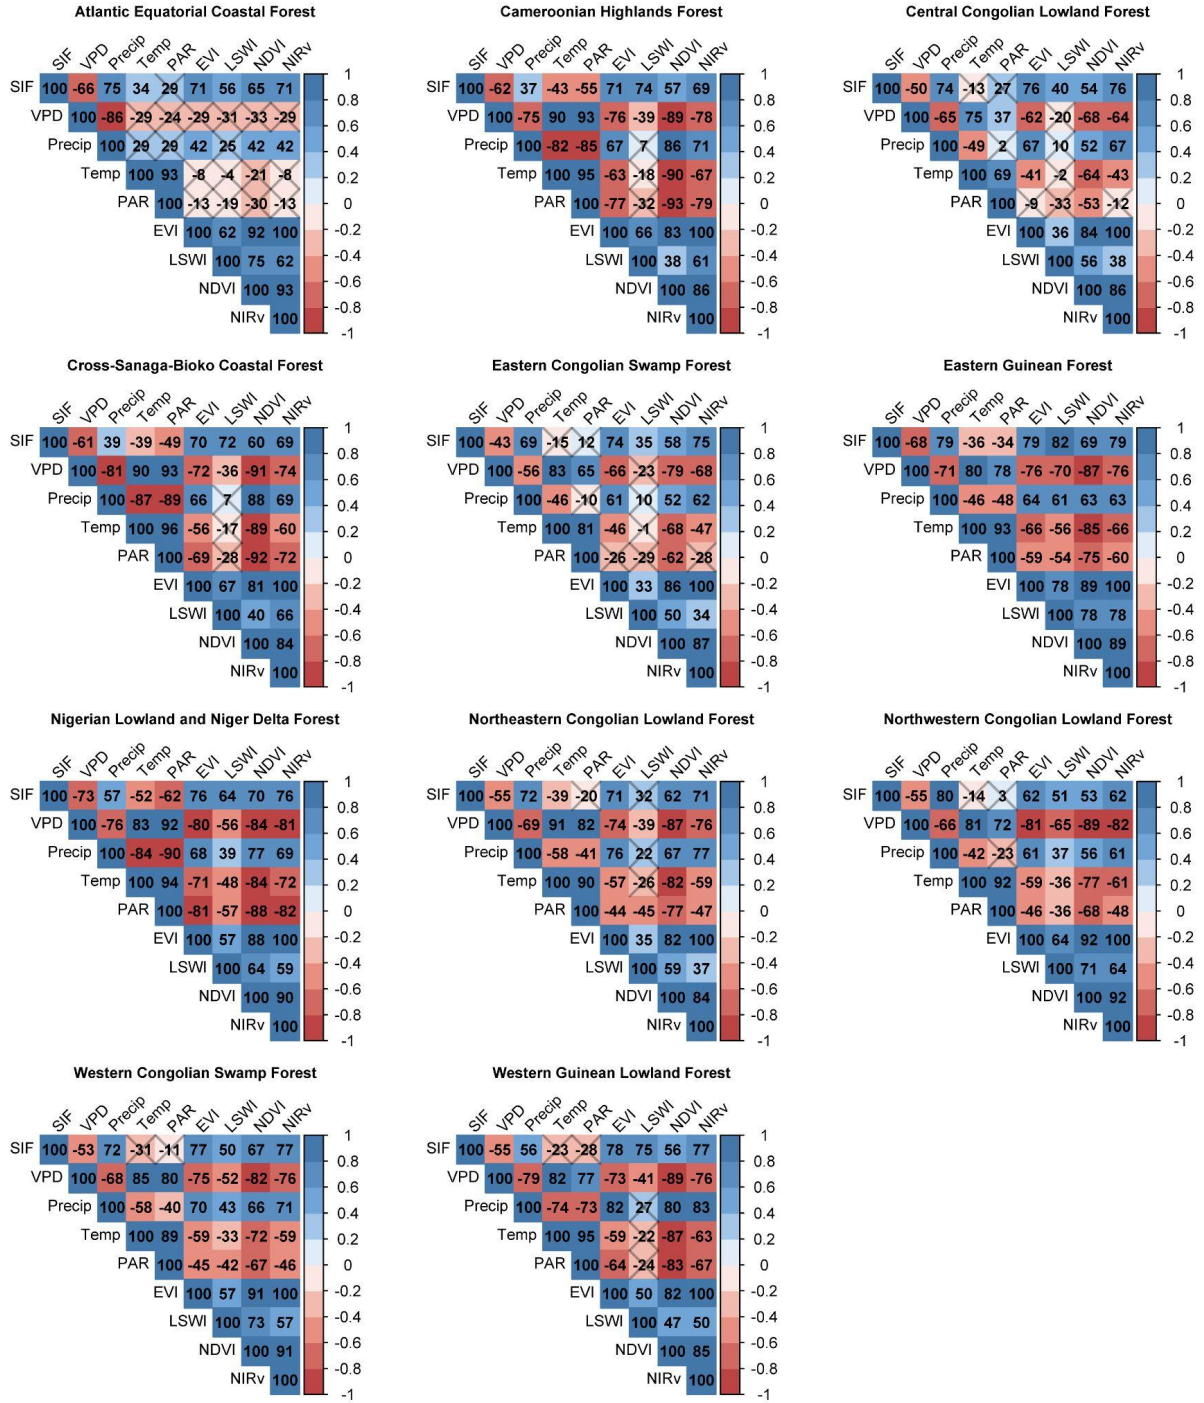

Figure S1. Pearson's correlations in percent ( $r * 100$ ). X means the correlation was not significant at the  $p < 0.05$  level of significance.

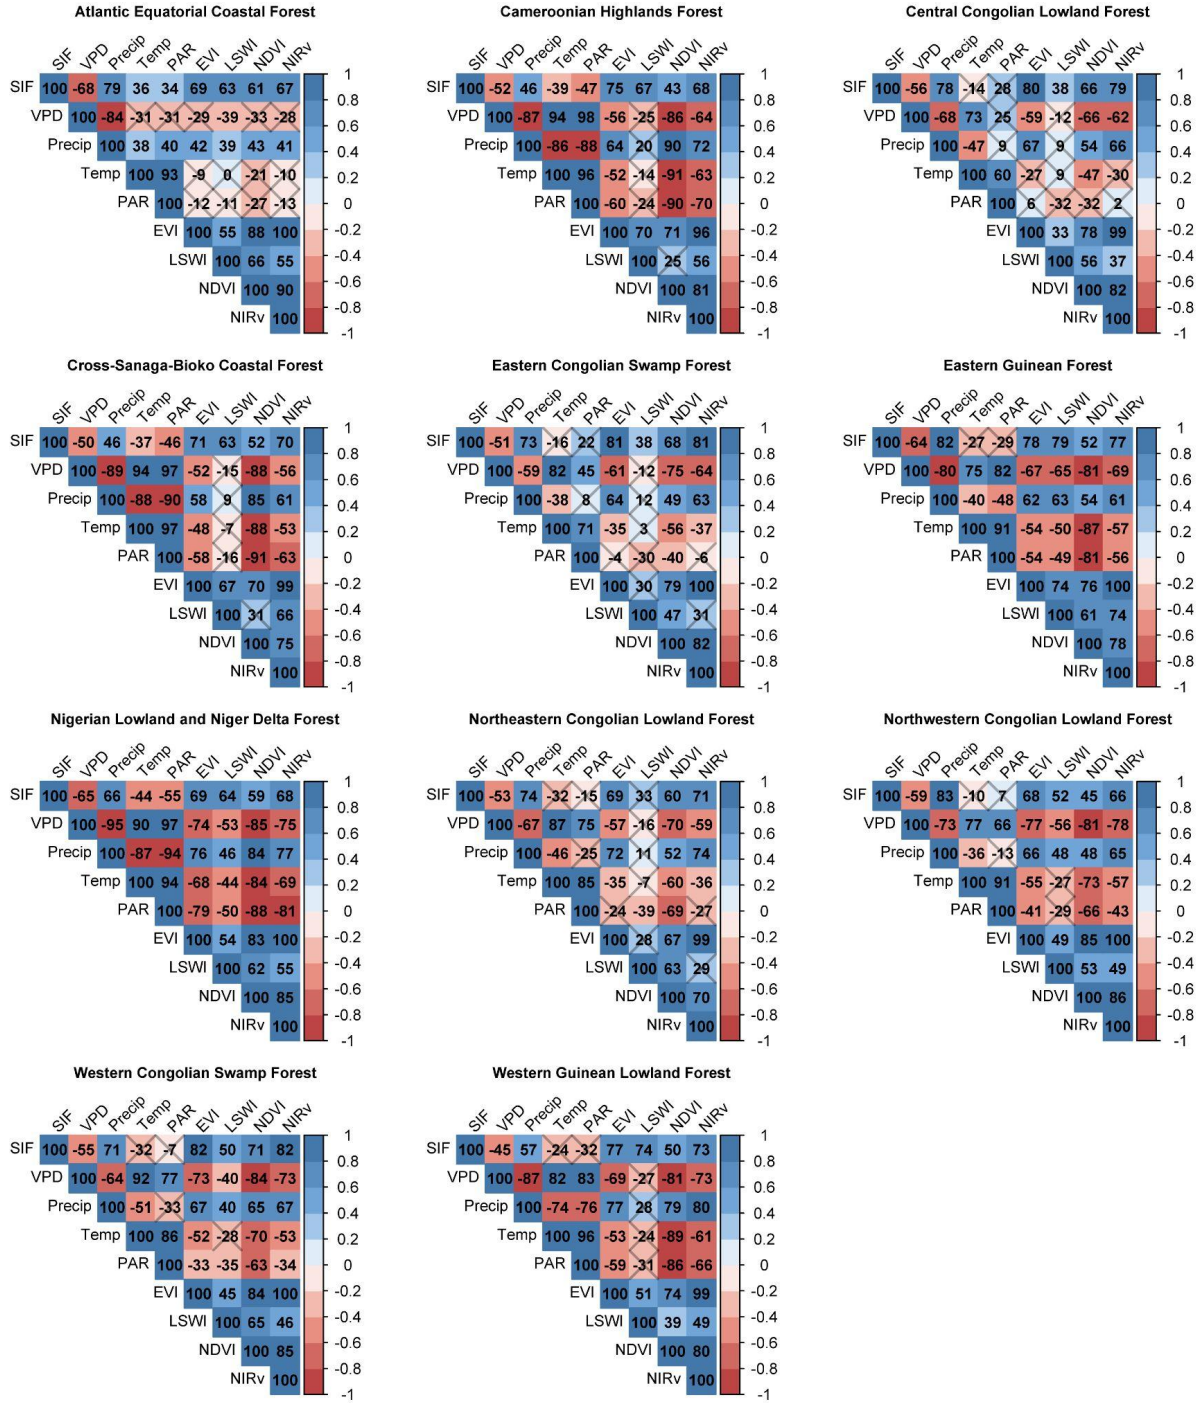

Figure S2. Spearman's correlations in percent ( $r * 100$ ). X means the correlation was not significant at the  $p < 0.05$  level of significance.

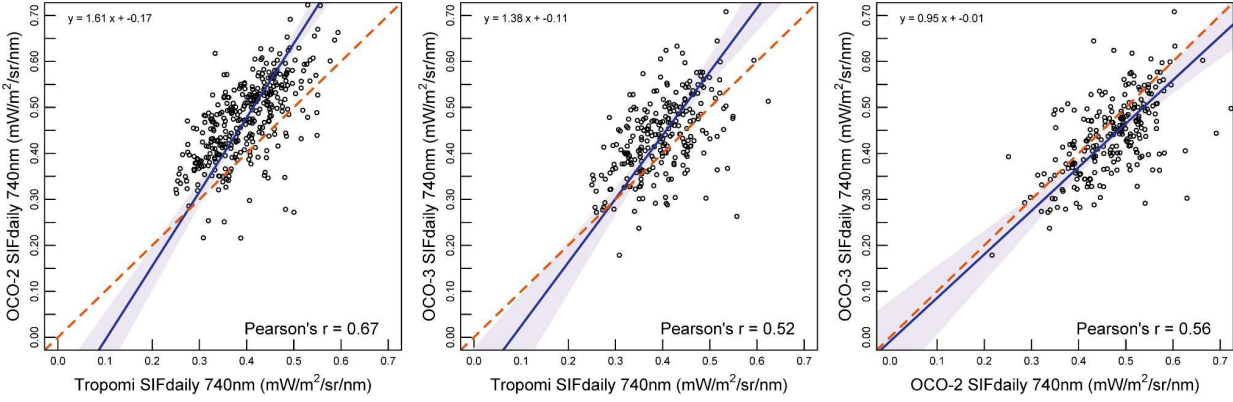

Figure S3. Cross-sensor comparisons using Deming regressions of the monthly mean SIFdaily from all 11 ecoregions in Fig. 5.

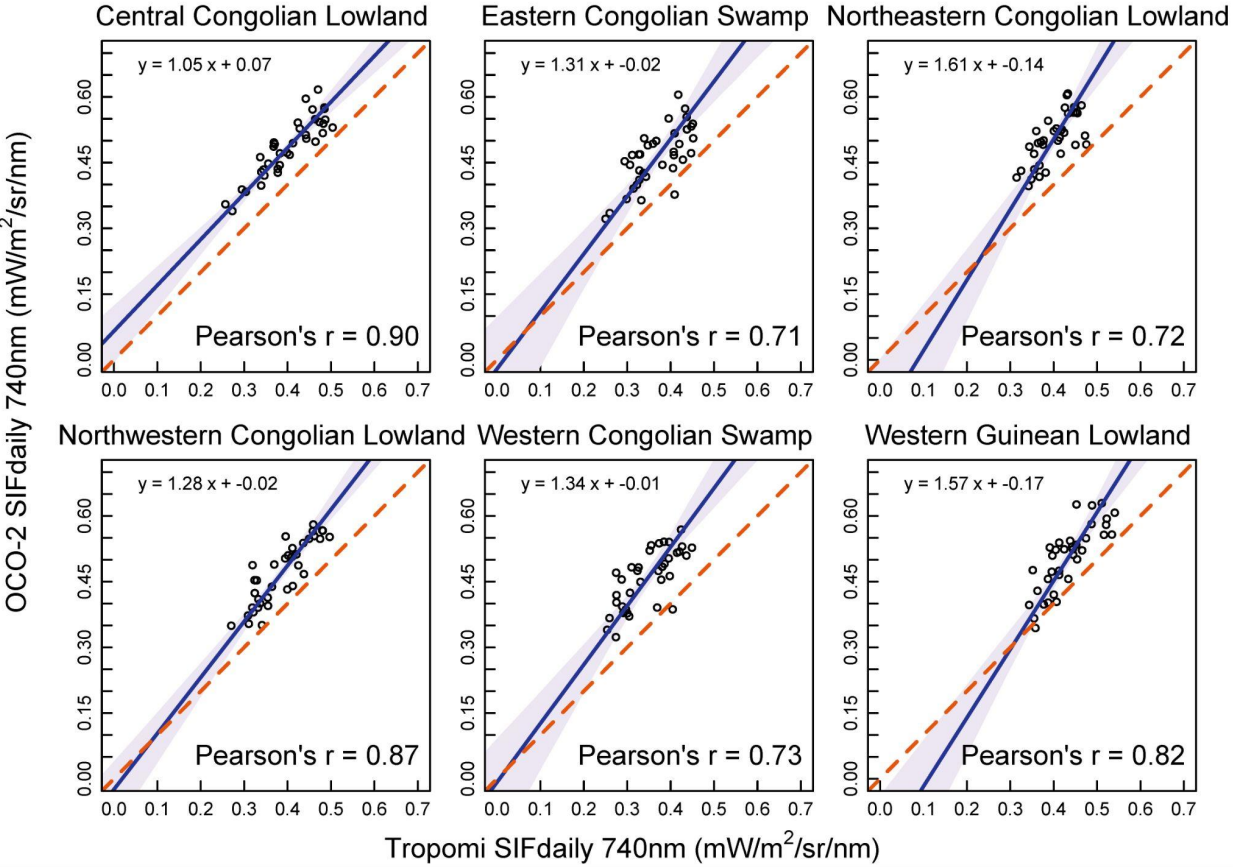

Figure S4. Cross-sensor comparisons using Deming regressions of the monthly mean SIFdaily from all 11 ecoregions in Fig. 4.
